# Supplementary material
Source: PubMed Central journal article supplement (PMC3381095)
Supplement: supp_en.2011-1822v1_EN-11-1822Supp_Data.pdf [file supp_en.2011-1822v1_EN-11-1822Supp_Data.pdf]

Supplemental Data

| <b>qPCR Primer</b> | <b>Forward Sequence</b>           | <b>Reverse Sequence</b>          |
|--------------------|-----------------------------------|----------------------------------|
| AGRP               | 5'-GAG TCC TGC TTG GGA CAG C -3'  | 5'-CTT GCG GCA GTA GCA AAA GG-3' |
| NPY                | 5'-GGA CTG ACC CTC GCT CTA TC-3'  | 5'-AGT GTC GCA GAG CGG AGT AG-3' |
| POMC               | 5'-TGG AAG ATG CCG AGA TTC TGC-3' | 5'-CAA GCC AGC AGG TTG CTC TC-3' |
| ACTB               | 5'-GCGCAAGTACTCTGTGTGGA-3'        | 5'-GAAAGGGTGTAACCGCAGC-3'        |

| <b>Single Cell RT-PCR Primers</b> | <b>Forward Sequence</b>        | <b>Reverse Sequence</b>        |
|-----------------------------------|--------------------------------|--------------------------------|
| MC4R                              | 5'-ACGGTTAGGCGGGTCGGGAT-3'     | 5'-TGGTCCCTGTGCCTGGGAGG-3'     |
| MC4R Nested                       | 5'-ATCATCATAAGTTGTATCTGGG-3'   | 5'-ACAGCAATCCTCTTAATGTGA-3'    |
| ACTB                              | 5'-CTGGAGAAGAGCTATGAGCTGCCT-3' | 5'-CTCCTGCTTGCTGATCCACATCTG-3' |
| ACTB Nested                       | 5'-GCGCAAGTACTCTGTGTGGA-3'     | 5'-GAAAGGGTGTAACCGCAGC-3'      |
